# Supplementary material for: Temporal changes in the spatial distribution of carabid beetles around arable field-woodlot boundaries
Source: PubMed Central journal article supplement (PMC6586664; doi:10.1038/s41598-019-45378-7), 2019-06-20
Supplement: 41598_2019_45378_MOESM1_ESM.pdf [file 41598_2019_45378_MOESM1_ESM.pdf]

## **Temporal changes in the spatial distribution of carabid beetles around arable field-woodlot boundaries**

**Michal Knapp<sup>1</sup>\*, Miroslav Seidl<sup>1</sup>, Jana Knappová<sup>2,3</sup>, Martin Macek<sup>2,3</sup>, Pavel Saska<sup>1,4</sup>**

<sup>1</sup> Department of Ecology, Faculty of Environmental Sciences, Czech University of Life Sciences Prague, CZ-165 00, Prague - Suchbát, Czech Republic; [knapp@fzp.czu.cz](mailto:knapp@fzp.czu.cz), [seidlm@fzp.czu.cz](mailto:seidlm@fzp.czu.cz)

<sup>2</sup> Institute of Botany, Czech Academy of Sciences, Zámek 1, CZ-252 43, Průhonice, Czech Republic; [jana.knappova@ibot.cas.cz](mailto:jana.knappova@ibot.cas.cz), [martin.macek@ibot.cas.cz](mailto:martin.macek@ibot.cas.cz)

<sup>3</sup> Department of Botany, Faculty of Science, Charles University, Benátská 2, CZ-128 01, Prague 2, Czech Republic

<sup>4</sup> Crop Research Institute, Drnovská 507, CZ-161 06, Prague 6 - Ruzyně, Czech Republic; [saska@vurv.cz](mailto:saska@vurv.cz)

**Supplementary material:**

**Figures S1 – S4**

**R Script**

**Figure S1 - Aerial photograph of the study area.** This figure is not covered by the CC BY licence. [Source: www.mapy.cz< <http://www.mapy.cz>>]. All rights reserved, used with permission. Drawings were added in Photoshop 5.0 software.

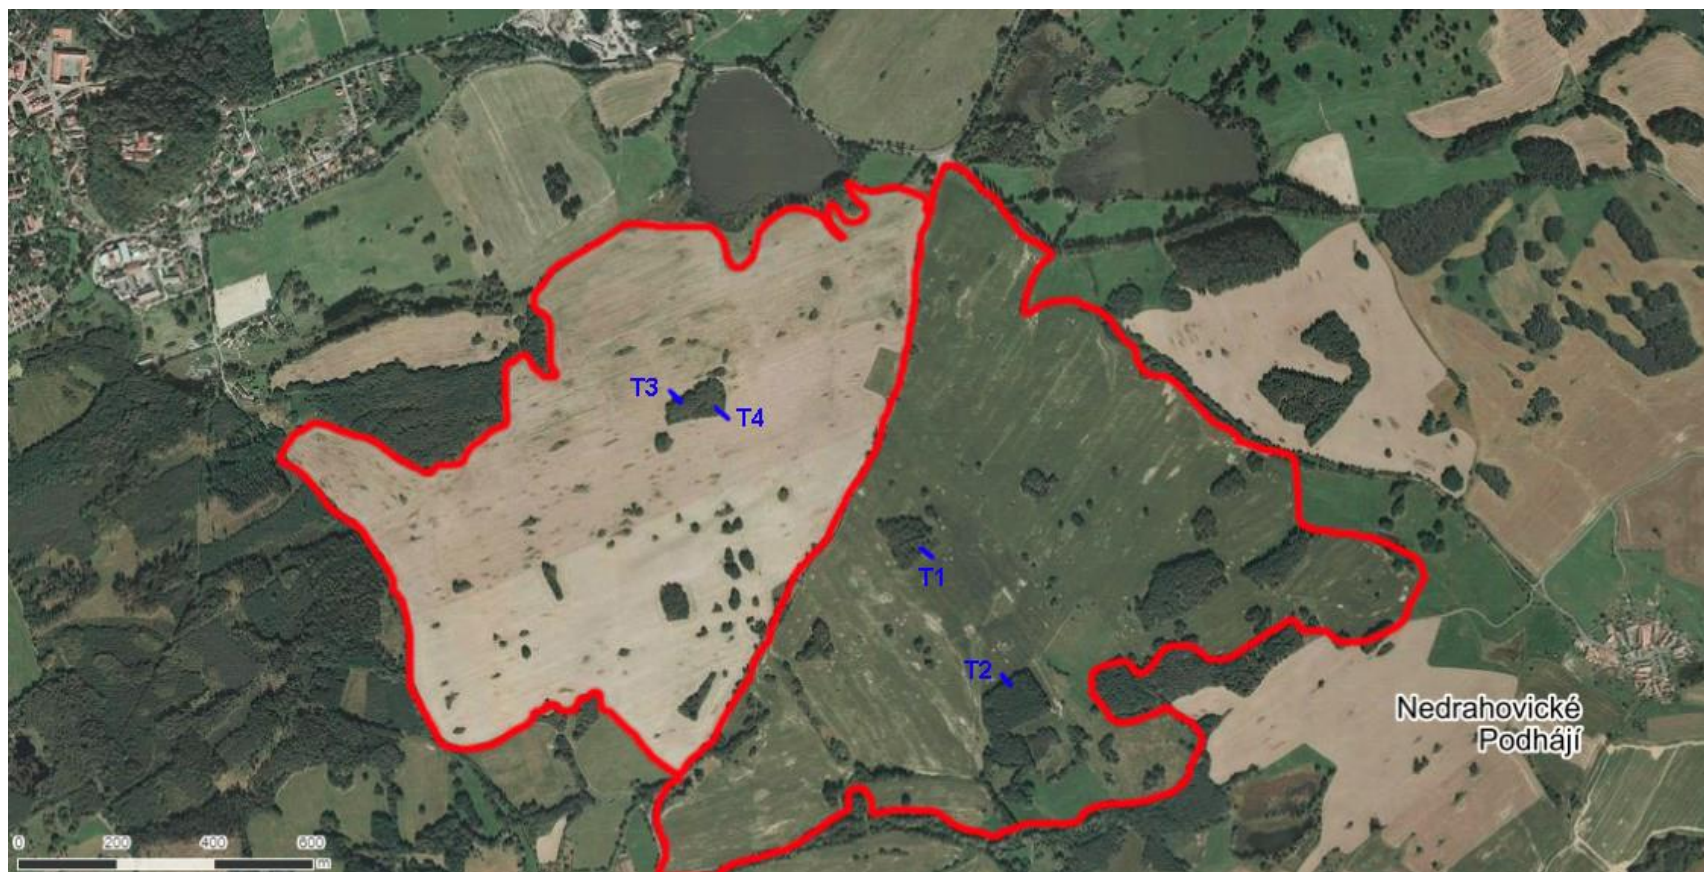

**Figure S2** - Comparison of carabid abundance (activity-density) between woodlot and arable field interiors

```
> m<-glmmPQL(N~Period*Position, random =~ 1|Transect, family=quasipoisson, data=dat)
```

```
> anova.lme(m, test="F")
```

|                 | numDF | denDF | F-value  | p-value |
|-----------------|-------|-------|----------|---------|
| (Intercept)     | 1     | 21    | 621.4771 | <.0001  |
| Period          | 3     | 21    | 10.1275  | 0.0002  |
| Position        | 1     | 21    | 16.0571  | 0.0006  |
| Period:Position | 3     | 21    | 0.3696   | 0.7757  |

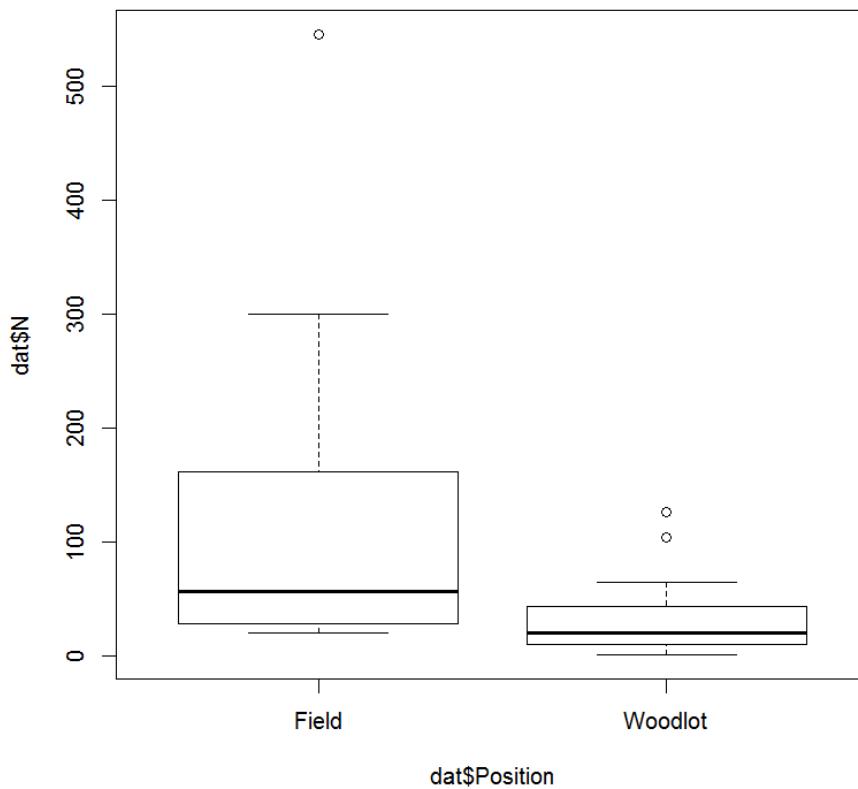

**Figure S3 - Temporal shifts in species composition of carabid assemblages originating from various sampling sites (positions on transects)**

For the purpose of visualisation of temporal shifts in carabid assemblages originating from particular distances, unconstrained unimodal analysis DCA was performed. Samples were classified according to the position on a transect (-20 m = yellow, -10 m = orange, -3 m = red, 0 m = brown, 3 m = light green, 10 m = medium green, 20 m = dark green) within resulting ordination diagram and these originating from the same transect were connected by lines to highlight temporal changes of respective carabid assemblages.

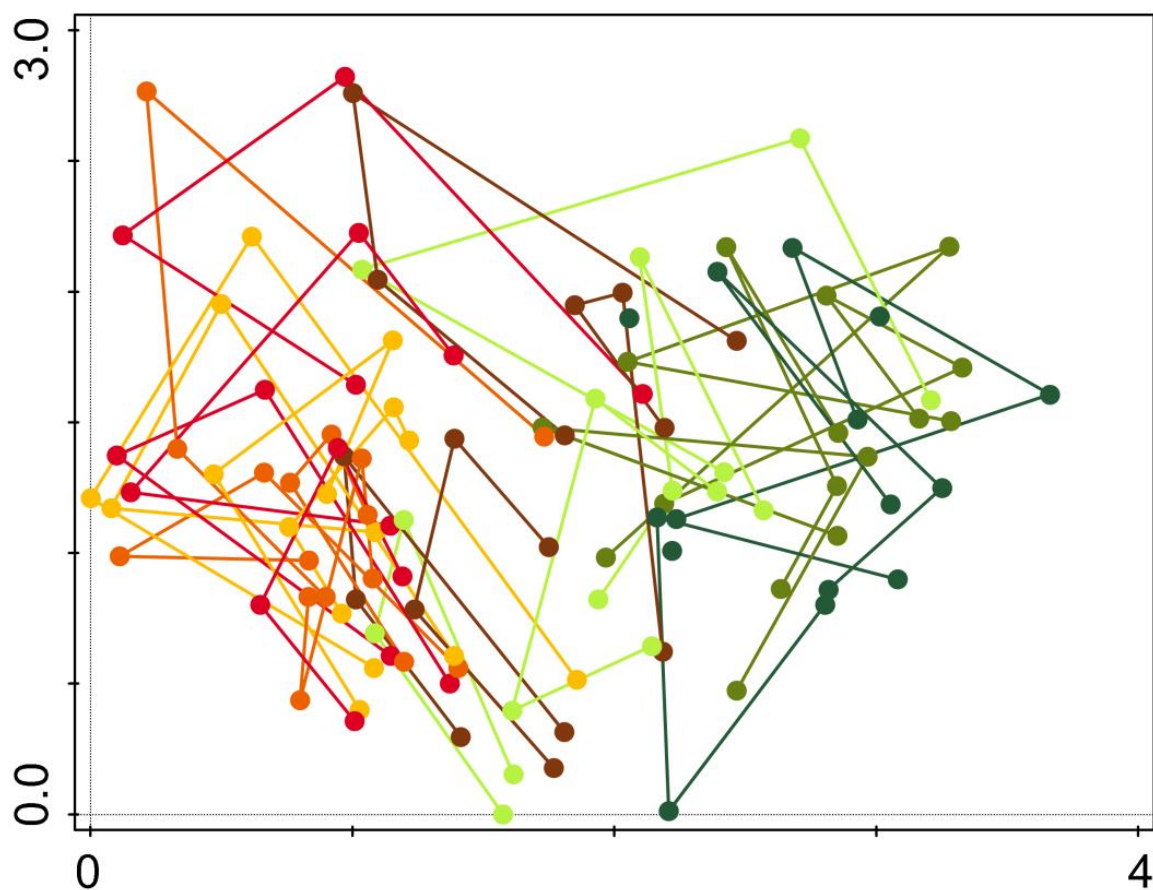

Figure S4 - Net effect of time on species composition of carabid assemblages

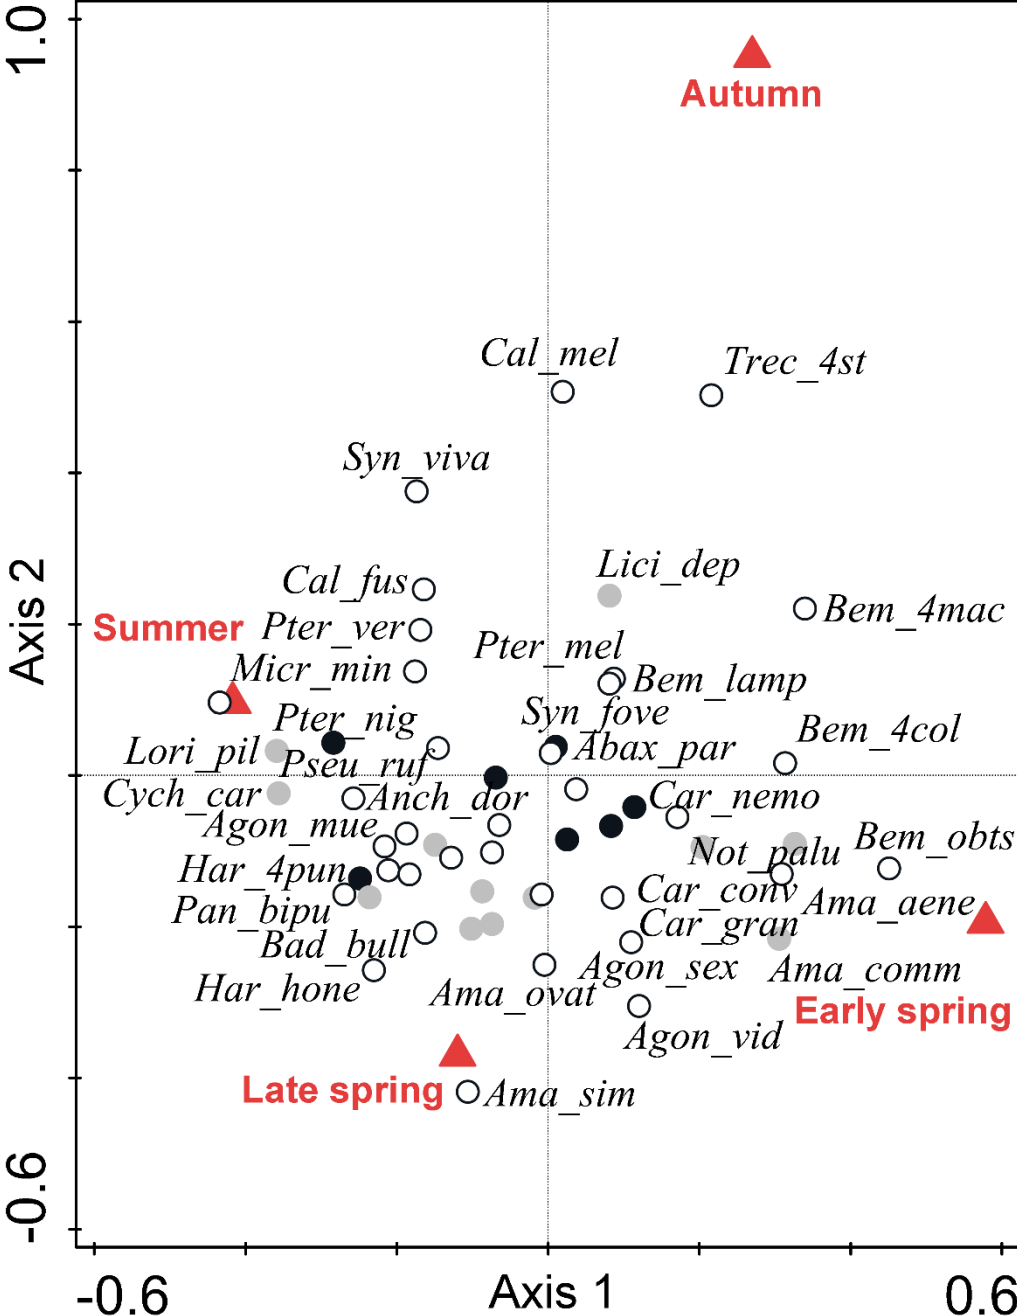

## Knapp et al. – Scientific Reports

### R script

```
### Supplementary material to the manuscript#
### Temporal changes in the spatial distribution of carabid beetles
around arable field-woodlot boundaries -----
### code written by Martin Macek martin.macek@ibot.cas.cz

#code written and used under R 3.2.5 version
library(eHOF) #using eHOF version 1.7

carabid <- read.table("carabid.csv",sep=";",head=T) #read data from file
str(carabid) #check table structure

#carabid activity
#compares spatial structure of activity of carabid beetles (using
relative numbers - e.g. actual number of individuals at given sample
divided by transect total at given sampling period)

month.sel <- c(7,10,4,5) # select sampling periods for pairwise
comparison
bootnr <- 499 #set number of permutations
x <- unique(head.sp$Distance)
set.seed(324)
types <- c("I","II","III","IV","V")

#relative activity
variables <- c("std.count","o.count","f.count","g.count") #select
variable of interest: relative activity
var.names <- c("All carabids","Open habitat species","Forest
species","Habitat generalists")

#relative diversity
variables <- c("total.prop","open.prop","for.prop","gen.prop") #select
variable of interest: relative diversity
var.names <- c("All carabids","Open habitat species","Forest
species","Habitat generalists")

#prepare multiple-plot window
widths <- rep(1,length(variables))
widths[1] <- 1.1 # make first column 10% wider
heights <- rep(1,length(month.sel))
heights[length(month.sel)] <- 1.1 # make last row 10% wider

#pdf("relative_activity.pdf",8,8) #inicialize pdf device (relative
activity)
pdf("relative_diversity.pdf",8,8) #inicialize pdf device (relative
diversity)

layout(mat=matrix(data =
1:(length(variables)*length(month.sel)),nrow=length(variables),ncol=4,byr
ow=T),widths=widths,heights=heights)

for(j in 1:length(variables)){
  variable <- variables[j]
```

```

set.seed(324)
for(k in 1:4){
  pair <- month.sel[-k] #rest of the year to be compared with
selected month
  hof.pred <- matrix(data= NA, nrow = length(-20:20), ncol = bootnr)
#create matrix to store bootstrapped values
  for(i in 1:bootnr){subs <- c(sample(which(carabid$Distance == x[1]
& carabid$Month %in% pair),12,replace=T), #sample values with
replacement for each transect position
                                sample(which(carabid$Distance == x[2]
& carabid$Month %in% pair),12,replace=T),
                                sample(which(carabid$Distance == x[3]
& carabid$Month %in% pair),12,replace=T),
                                sample(which(carabid$Distance == x[4]
& carabid$Month %in% pair),12,replace=T),
                                sample(which(carabid$Distance == x[5]
& carabid$Month %in% pair),12,replace=T),
                                sample(which(carabid$Distance == x[6]
& carabid$Month %in% pair),12,replace=T),
                                sample(which(carabid$Distance == x[7]
& carabid$Month %in% pair),12,replace=T))
  occ <- carabid[subs,variable] #permuted relative activity values
  grad <- carabid[subs,"Distance"] #transect positions of permuted
samples
  hof.rnd <- HOF(occ,grad,family = gaussian,boot= NULL,selectMethod =
"IC.weight", modeltypes=types,M=1,lim=100,test="Dev") #HOF model
  hof.pred[,i] <-
predict(hof.rnd,model=pick.model(hof.rnd,test="Dev",modeltypes
=types),newdata = c(-20:20)) #store prediction from model to matrix
}

  occ.obs.yr <- carabid[carabid$Month %in% pair,variable] #permuted
relative activity values
  grad.yr <- carabid[carabid$Month %in% pair,"Distance"] #transect
positions of permuted samples
  hof.yr <- HOF(occ.obs.yr,grad.yr,family = gaussian,boot=
NULL,selectMethod = "IC.weight", modeltypes=types,M=1,lim=100,test="Dev")
#HOF model
  hof.pred.yr <-
predict(hof.rnd,model=pick.model(hof.rnd,test="Dev",modeltypes
=types),newdata = c(-20:20)) #store prediction from model to matrix

  pair.2 <- month.sel[k] #month selected for comparison, same as
previos
  hof.pred.2 <- matrix(data= NA, nrow = length(-20:20), ncol =
bootnr)
  for(i in 1:bootnr){subs.2 <- c(sample(which(carabid$Distance ==
x[1] & carabid$Month %in% pair.2),4,replace=T), #sample values with
replacement for each transect position
                                sample(which(carabid$Distance ==
x[2] & carabid$Month %in% pair.2),4,replace=T),
                                sample(which(carabid$Distance ==
x[3] & carabid$Month %in% pair.2),4,replace=T),
                                sample(which(carabid$Distance ==
x[4] & carabid$Month %in% pair.2),4,replace=T),

```

```

                                sample(which(carabid$Distance ==
x[5] & carabid$Month %in% pair.2),4,replace=T),
                                sample(which(carabid$Distance ==
x[6] & carabid$Month %in% pair.2),4,replace=T),
                                sample(which(carabid$Distance ==
x[7] & carabid$Month %in% pair.2),4,replace=T))
    occ.2 <- carabid[subs.2,variable]
    grad.2 <- carabid[subs.2,"Distance"]
    hof.rnd.2 <- HOF(occ.2,grad.2,family = gaussian,boot=
NULL,selectMethod = "IC.weight", modeltypes=types,M=1,lim=100,test="Dev")
    hof.pred.2[,i] <-
predict(hof.rnd.2,model=pick.model(hof.rnd.2,test="Dev",modeltypes
=types),newdata = c(-20:20))
}

#HOF for original data
occ.obs <- carabid[which(carabid$Month == pair.2),variable]
grad.obs <- carabid[which(carabid$Month == pair.2),"Distance"]
hof.obs <- HOF(occ.obs,grad.obs,family = gaussian,boot=
NULL,selectMethod = "IC.weight", modeltypes=types,M=1,lim=100,test="Dev")
hof.obs.pred <-
predict(hof.rnd.2,model=pick.model(hof.rnd.2,test="Dev",modeltypes
=types),newdata = c(-20:20))

#plot results
if(k == 1) par(mar=c(3,4.5,0.5,0.5)) # make space for labels in
first column
if(k > 1) par(mar=c(3,3,0.5,0.5))
if(k == 1 & j == 4) par(mar=c(4.5,4.5,0.5,0.5)) # make space for
labels in first column of last row
if(k > 1 & j == 4) par(mar=c(4.5,3,0.5,0.5)) # make space for
labels in last row

ylim <- max(carabid[,variable]) #set ylim for a row using maximum
observed value of variable
plot(seq(-20,20,1),
apply(hof.pred,1,quantile,0.5),ylim=c(0,ylim),type="n",xlab=NA,ylab=NA,ma
in=NA,cex.axis=1.1)
grid(lty=3,col="gray60")
#text(-20,ylim*0.9,c(month.sel)[k],cex=1.2,pos=4) code by months
text(-20,ylim*0.9,LETTERS[(j-1)*length(month.sel) +
k],cex=1.2,pos=4) #code by letters
if(k == 1) mtext(var.names[j],2,3,cex=1.1) #y axis labels

polygon(c(-20:20,20:-20),
c(apply(hof.pred,1,quantile,0.025),rev(apply(hof.pred,1,quantile,0.975)))
,col="#00000030",border=NA)
lines(-20:20, apply(hof.pred,1,median),lwd=2,lty=2) #median of
bootstrapped model predictions
#lines(-20:20, hof.pred.yr,lwd=2,lty=2) #observed model prediction

polygon(c(-20:20,20:-20),
c(apply(hof.pred.2,1,quantile,0.025),rev(apply(hof.pred.2,1,quantile,0.97
5))),col="#AD111160",border=NA)
lines(-20:20, apply(hof.pred.2,1,median),lwd=2,lty=1,col=2) #median
of bootstrapped model predictions
#lines(-20:20,hof.obs.pred,lwd=2,lty=1,col=2) #original data fit

```



```
        if(k == 3 & j == length(variables)) mtext("Distance from arable  
field-woodlot boundary (m)",1,3,cex=1.2,adj=1)  
    }  
}  
dev.off()
```
